# Supplementary material for: Hydrogen production and degradation of organic pollutants catalyzed by C/Ti3C2/g-C3N4 hollow microsphere Schottky junctions with a built-in electric field in organic wastewater
Source: Royal Society of Chemistry journal article supplement (doi:10.1039/d3nj03007e), 2023-01-01
Supplement: d3nj03007e1.pdf [file d3nj03007e1.pdf]

Table S1. The elemental composition of the materials.

| Samples                         | Elemental composition (wt%) |       |       |
|---------------------------------|-----------------------------|-------|-------|
|                                 | Ti                          | C     | N     |
| g-C <sub>3</sub> N <sub>4</sub> | -                           | 37.05 | 62.95 |
| CN-TCM-1                        | 18.09                       | 79.60 | 2.30  |
| CN-TCM-2                        | 11.63                       | 73.93 | 14.44 |
| CN-TCM-3                        | 6.32                        | 76.77 | 16.90 |
| CN-TCM-5                        | 3.77                        | 74.04 | 22.18 |

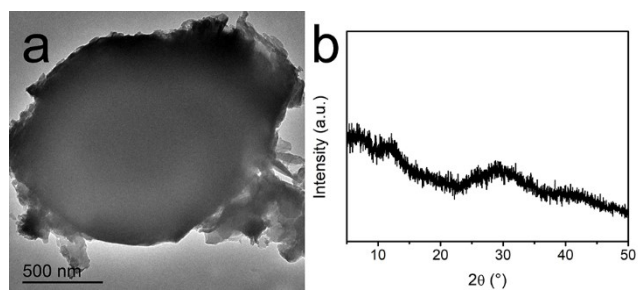

Figure S1. The TEM (a) and XRD (b) results of CN-TCM-3 after the consecutive repeating experiments.
